# Supplementary material
Source: MDPI journal article supplement (https://www.mdpi.com/2072-4292/14/2/267)
Supplement: s1 [file s1]

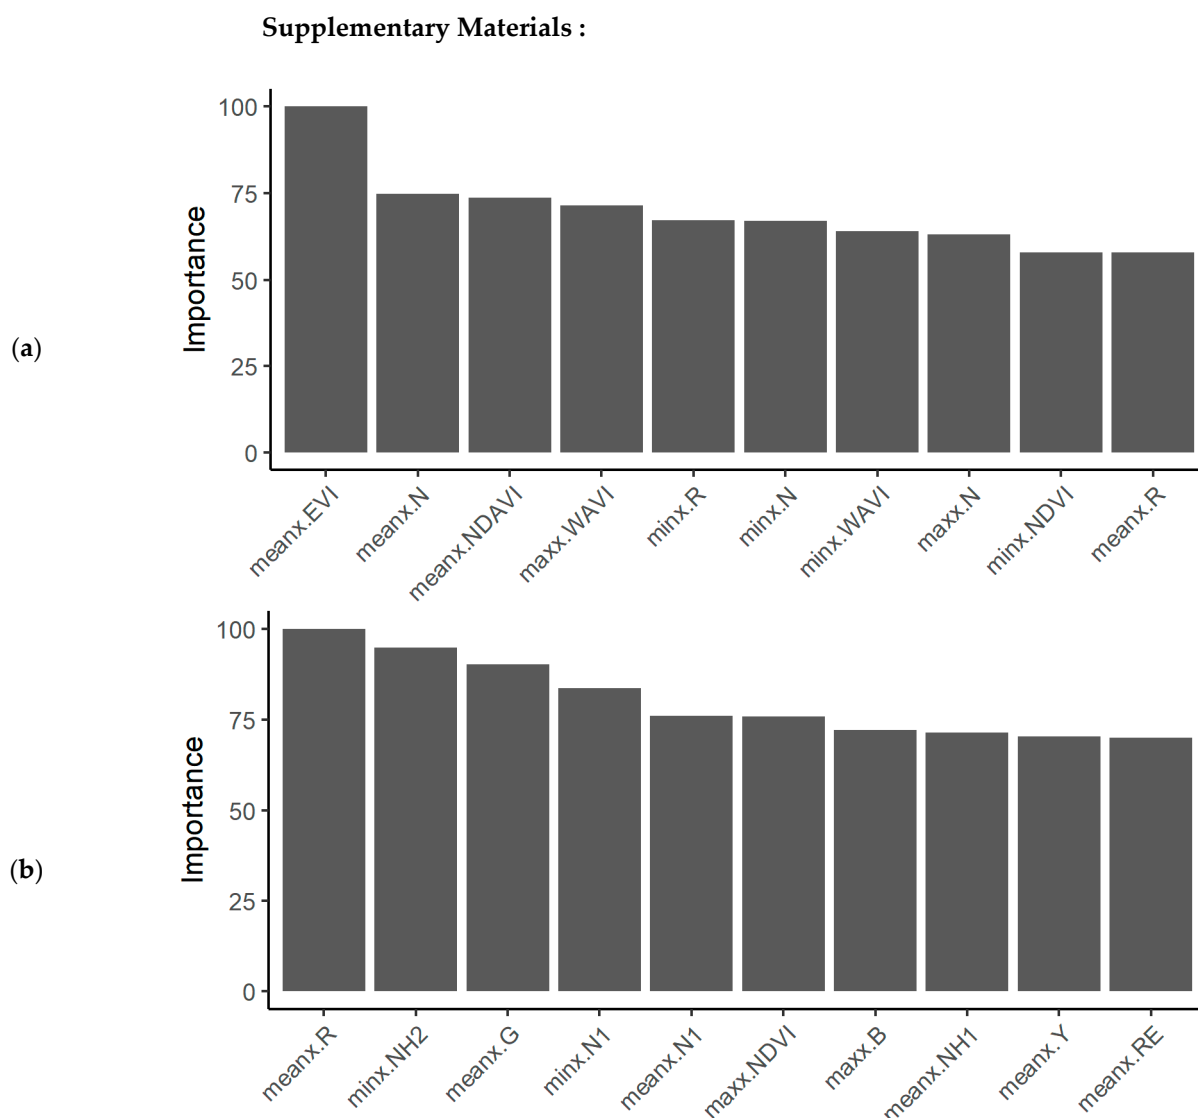

**Figure S1.** Subset of the 10 most important features for level 1 OBIA random forest classifier for land masking in the (a) 2009 Quickbird-02 image of lake Saint-Pierre and the (b) 2019 Worldview-03 image of the lake Saint-François. The prefixes are the zonal statistics followed by “x”, and the suffixes are the band on which it was calculated : Coastal (C), Blue (B), Green (G), Yellow (Y), Red (R), Red Edge (RE), Near Infrared 1 & 2 (N1 and N2), the vegetation indexes (NDVI, EVI, NDAVI, WAVI) and the textural indexes (NH1-8 and BH1-8)

**Table S1.** Confusion matrix for the level 1 OBIA land masking model of the 2009 Quickbird-02 image of the lake Saint-Pierre. FP, mFP, FN and mFN and n respectively mean false positive, meaningful false positive, false negative, meaningful false negative and the number of objects per class in the training set. Meaningful errors are calculated using only the red cells, where confusion will impact the land masking performance.

|           |            | Observed |         |          |          |            |        |       |       |           |         |         |        |       |
|-----------|------------|----------|---------|----------|----------|------------|--------|-------|-------|-----------|---------|---------|--------|-------|
| Predicted | Classes    | l_ag     | l_boats | l_forest | l_shadow | l_wetlands | o_foam | v_em  | v_sub | w_bg_deep | w_brown | w_dark  | FP     | mFP   |
|           | l_ag       | 30.58    | 0.00    | 0.14     | 0.00     | 0.22       | 0.00   | 0.00  | 0.00  | 0.00      | 0.00    | 0.00    | 1.15%  | 0.00% |
|           | l_boats    | 0.00     | 0.04    | 0.00     | 0.00     | 0.00       | 0.00   | 0.00  | 0.00  | 0.00      | 0.00    | 0.00    | 0.00%  | 0.00% |
|           | l_forest   | 0.00     | 0.00    | 6.76     | 0.00     | 0.00       | 0.00   | 0.00  | 0.00  | 0.00      | 0.00    | 0.00    | 0.00%  | 0.00% |
|           | l_shadow   | 0.00     | 0.00    | 0.00     | 4.12     | 0.00       | 0.00   | 0.00  | 0.00  | 0.00      | 0.00    | 0.00    | 0.00%  | 0.00% |
|           | l_wetlands | 0.04     | 0.00    | 0.00     | 0.00     | 26.73      | 0.00   | 0.00  | 0.00  | 0.00      | 0.00    | 0.00    | 0.14%  | 0.00% |
|           | o_foam     | 0.00     | 0.00    | 0.00     | 0.00     | 0.00       | 2.91   | 0.00  | 0.00  | 0.02      | 0.00    | 0.00    | 0.84%  | 0.84% |
|           | v_em       | 0.00     | 0.16    | 0.00     | 0.00     | 0.00       | 0.00   | 8.43  | 0.14  | 0.00      | 0.17    | 0.12    | 6.54%  | 1.77% |
|           | v_sub      | 0.00     | 0.00    | 0.00     | 0.00     | 0.00       | 0.01   | 0.06  | 9.40  | 0.32      | 0.00    | 0.05    | 4.49%  | 0.12% |
|           | w_bg_deep  | 0.00     | 0.00    | 0.00     | 0.00     | 0.00       | 0.00   | 0.00  | 0.07  | 1.39      | 0.16    | 0.00    | 14.39% | 0.00% |
|           | w_brown    | 0.00     | 0.00    | 0.00     | 0.00     | 0.00       | 0.00   | 0.01  | 0.00  | 0.07      | 7.80    | 0.06    | 1.85%  | 0.00% |
|           | w_dark     | 0.00     | 0.00    | 0.00     | 0.00     | 0.00       | 0.00   | 0.00  | 0.00  | 0.00      | 0.00    | 0.00    | 0.00%  | 0.00% |
| FN        |            | 0.12%    | 81.25%  | 1.96%    | 0.00%    | 0.82%      | 0.42%  | 0.87% | 2.17% | 23.13%    | 4.08%   | 100.00% |        |       |
| mFN       |            | 0.00%    | 81.25%  | 0.00%    | 0.00%    | 0.00%      | 0.42%  | 0.00% | 0.00% | 1.36%     | 0.00%   | 0.00%   |        |       |
| n         |            | 332      | 3       | 80       | 45       | 297        | 32     | 97    | 106   | 22        | 90      | 3       |        |       |

**Table S2.** Confusion matrix for the level 1 OBIA land masking model of the 2019 Worview-03 image of lake Saint-François. FP, mFP, FN and mFN and n respectively mean false positive, meaningful false positive, false negative, meaningful false negative and the number of objects per class in the training set. Meaningful errors are calculated using only the red cells, where confusion will impact the land masking performance.

| Predicted | Observed   |       |          |         |          |        |          |       |            |       |            |        |           | FP | mFP |       |       |
|-----------|------------|-------|----------|---------|----------|--------|----------|-------|------------|-------|------------|--------|-----------|----|-----|-------|-------|
|           | Classes    | l_ag  | l_anthro | l_boats | l_forest | l_sand | l_shadow | l_wet | o_boatwave | v_em  | v_floating | w_deep | w_shallow |    |     |       |       |
|           | l_ag       | 23.74 | 0.03     | 0.00    | 0.00     | 0.00   | 0.00     | 0.31  | 0.00       | 0.00  | 0.00       | 0.00   | 0.00      |    |     | 1.39% | 0.00% |
|           | l_anthro   | 0.02  | 11.25    | 0.09    | 0.00     | 0.29   | 0.13     | 0.00  | 0.00       | 0.00  | 0.00       | 0.00   | 0.00      |    |     | 4.52% | 0.00% |
|           | l_boats    | 0.00  | 0.03     | 0.37    | 0.00     | 0.00   | 0.00     | 0.00  | 0.00       | 0.00  | 0.00       | 0.00   | 0.00      |    |     | 8.51% | 0.00% |
|           | l_forest   | 0.00  | 0.00     | 0.00    | 21.36    | 0.00   | 0.11     | 0.00  | 0.00       | 0.00  | 0.00       | 0.00   | 0.00      |    |     | 0.52% | 0.00% |
|           | l_sand     | 0.00  | 0.03     | 0.00    | 0.00     | 1.56   | 0.00     | 0.00  | 0.00       | 0.00  | 0.00       | 0.00   | 0.00      |    |     | 1.63% | 0.00% |
|           | l_shadow   | 0.00  | 0.03     | 0.00    | 0.16     | 0.00   | 2.57     | 0.00  | 0.00       | 0.00  | 0.00       | 0.00   | 0.00      |    |     | 6.85% | 0.00% |
|           | l_wet      | 0.20  | 0.00     | 0.00    | 0.00     | 0.00   | 0.01     | 11.96 | 0.00       | 0.00  | 0.00       | 0.00   | 0.00      |    |     | 1.70% | 0.00% |
|           | o_boatwave | 0.00  | 0.00     | 0.12    | 0.00     | 0.00   | 0.00     | 0.00  | 4.05       | 0.00  | 0.00       | 0.00   | 0.00      |    |     | 2.89% | 0.00% |
|           | v_em       | 0.00  | 0.00     | 0.00    | 0.00     | 0.00   | 0.00     | 0.00  | 0.00       | 13.25 | 0.02       | 0.00   | 0.01      |    |     | 0.19% | 0.00% |
|           | v_floating | 0.00  | 0.00     | 0.00    | 0.00     | 0.00   | 0.00     | 0.00  | 0.00       | 0.00  | 4.92       | 0.00   | 0.00      |    |     | 0.00% | 0.00% |
|           | w_deep     | 0.00  | 0.00     | 0.00    | 0.00     | 0.00   | 0.00     | 0.00  | 0.00       | 0.00  | 0.00       | 0.16   | 0.00      |    |     | 0.00% | 0.00% |
|           | w_shallow  | 0.00  | 0.00     | 0.00    | 0.00     | 0.00   | 0.00     | 0.00  | 0.05       | 0.00  | 0.00       | 0.08   | 3.09      |    |     | 4.00% | 1.60% |
|           | FN         | 0.90% | 0.98%    | 36.76%  | 0.76%    | 15.81% | 8.84%    | 2.52% | 1.26%      | 0.00% | 0.35%      | 32.14% | 0.28%     |    |     |       |       |
| mFN       | 0.00%      | 0.00% | 0.00%    | 0.00%   | 0.00%    | 0.00%  | 0.00%    | 1.26% | 0.00%      | 0.00% | 0.00%      | 0.00%  |           |    |     |       |       |
| N         | 314        | 151   | 8        | 277     | 26       | 38     | 165      | 54    | 174        | 65    | 3          | 41     |           |    |     |       |       |

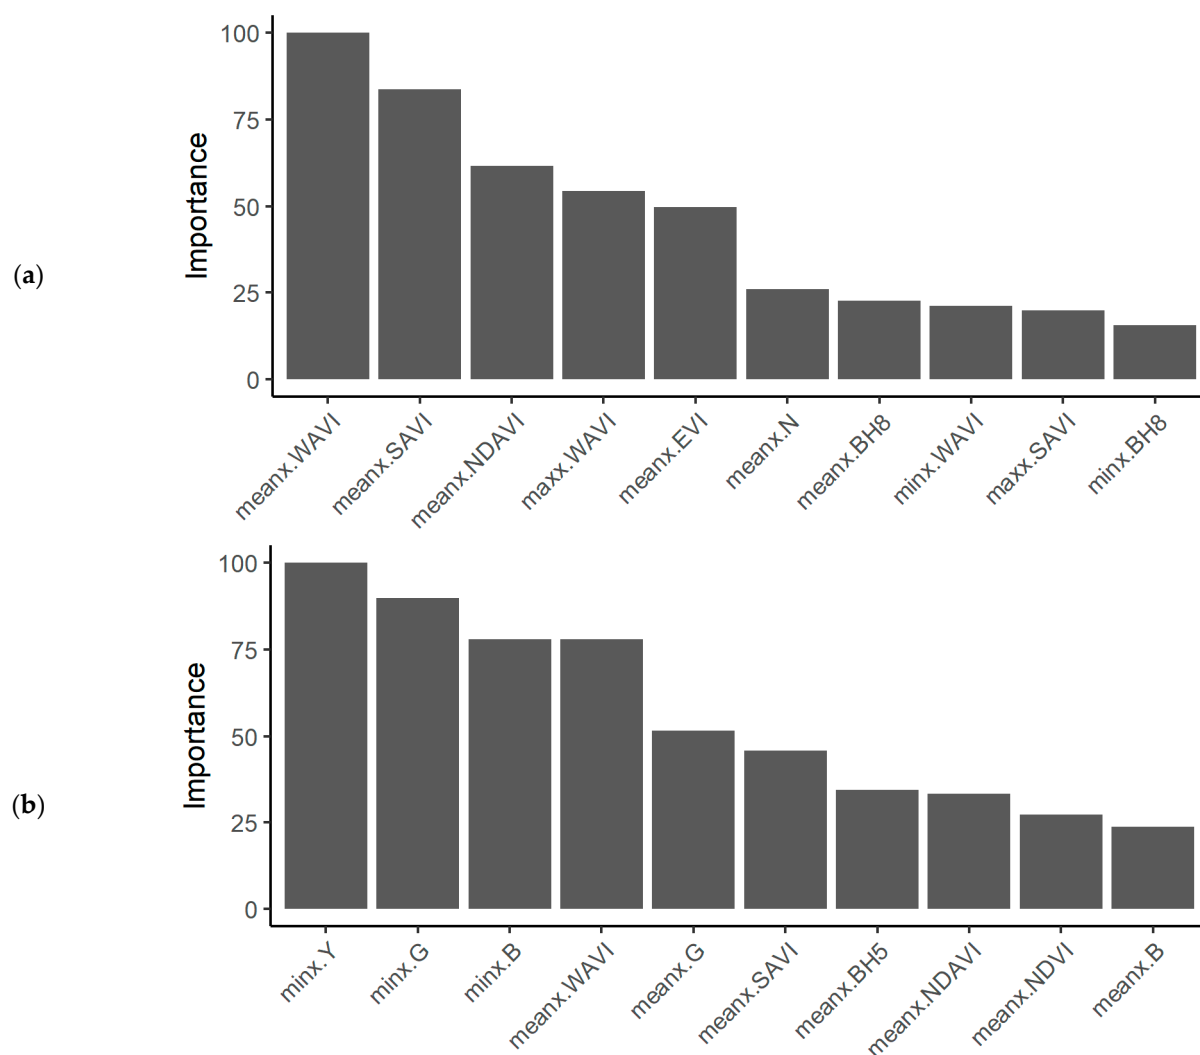

**Figure S2.** Subset of the 10 most important features for level 2 OBIA random forest classifier for SAV cover mapping in the **(a)** 2009 Quickbird-02 image of lake Saint-Pierre and the **(b)** 2019 Worldview-03 image of the lake Saint-François. The prefixes are the zonal statistics followed by “x”, and the suffixes are the band on which it was calculated: Coastal (C), Blue (B), Green (G), Yellow (Y), Red (R), Red Edge (RE), Near Infrared 1 & 2 (N1 and N2), the vegetation indexes (NDVI, EVI, NDAVI, WAVI) and the textural indexes (NH1-8 and BH1-8)

**Table S3.** Confusion matrix for the final level 2 OBIA SAV cover mapping model of the 2009 Quickbird-02 image of the lake Saint-Pierre. FP, mFP, FN and mFN and n respectively mean false positive, meaningful false positive, false negative, meaningful false negative and the number of objects per class in the training set. Meaningful errors are calculated using only the red cells, where confusion will impact the SAV cover mapping performance.

| Predicted | Classes    | v_em   | v_p_em | v_sub_high | v_sub_low | w_bg  | w_brown | w_dark | w_p_dark | w_shallow | FP     | mFP    |
|-----------|------------|--------|--------|------------|-----------|-------|---------|--------|----------|-----------|--------|--------|
|           | v_em       | 3.51   | 0.06   | 0.39       | 0.00      | 0.00  | 0.00    | 0.00   | 0.00     | 0.12      | 14.25% | 3.20%  |
|           | v_p_em     | 0.07   | 3.94   | 0.07       | 0.00      | 0.00  | 0.00    | 0.00   | 0.00     | 0.01      | 3.65%  | 0.40%  |
|           | v_sub_high | 0.91   | 0.11   | 9.89       | 0.21      | 0.00  | 0.18    | 0.43   | 0.14     | 0.08      | 17.19% | 6.88%  |
|           | v_sub_low  | 0.00   | 0.00   | 0.23       | 5.81      | 0.29  | 0.03    | 0.03   | 0.00     | 0.00      | 9.07%  | 5.54%  |
|           | w_bg       | 0.00   | 0.00   | 0.00       | 1.65      | 36.39 | 0.17    | 0.00   | 0.00     | 0.00      | 4.76%  | 4.32%  |
|           | w_brown    | 0.00   | 0.00   | 0.10       | 0.12      | 0.03  | 24.67   | 0.38   | 0.00     | 0.28      | 3.57%  | 0.85%  |
|           | w_dark     | 0.00   | 0.00   | 0.36       | 0.08      | 0.00  | 0.28    | 3.32   | 0.03     | 0.06      | 19.54% | 10.62% |
|           | w_p_dark   | 0.00   | 0.00   | 0.07       | 0.00      | 0.00  | 0.00    | 0.04   | 2.33     | 0.00      | 4.44%  | 2.93%  |
|           | w_shallow  | 0.17   | 0.00   | 0.03       | 0.00      | 0.00  | 0.06    | 0.00   | 0.00     | 2.87      | 8.12%  | 6.28%  |
| FN        |            | 24.62% | 4.23%  | 11.17%     | 26.11%    | 0.87% | 2.82%   | 21.07% | 7.01%    | 16.08%    |        |        |
| mFN       |            | 3.56%  | 0.10%  | 5.03%      | 23.46%    | 0.78% | 0.84%   | 11.09% | 5.79%    | 6.22%     |        |        |
| N         |            | 252    | 220    | 585        | 416       | 1957  | 1346    | 218    | 132      | 181       |        |        |

**Table S4.** Confusion matrix for the final level 2 OBIA SAV cover mapping model of the 2019 Worlview-03 image of the lake Saint-François. FP, mFP, FN and mFN and n respectively mean false positive, meaningful false positive, false negative, meaningful false negative and the number of objects per class in the training set. n values in parentheses mean these classes were randomly resampled down to a lower number of objects for balancing purposes. Meaningful errors are calculated using only the red cells, where confusion will impact the SAV cover mapping performance.

|           |            | Observed   |            |             |              |             |           |       |       |
|-----------|------------|------------|------------|-------------|--------------|-------------|-----------|-------|-------|
| Predicted | Classes    | o_boatwave | v_floating | v_sub_high  | v_sub_low    | w_deep      | w_shallow | FP    | mFP   |
|           | o_boatwave | 3.96       | 0.00       | 0.00        | 0.01         | 0.04        | 0.01      | 1.52% | 0.30% |
|           | v_floating | 0.00       | 0.76       | 0.00        | 0.00         | 0.02        | 0.00      | 3.82% | 0.36% |
|           | v_sub_high | 0.00       | 0.03       | 3.53        | 0.01         | 0.00        | 0.02      | 1.56% | 1.22% |
|           | v_sub_low  | 0.01       | 0.02       | 0.01        | 16.50        | 0.10        | 0.90      | 5.93% | 5.88% |
|           | w_deep     | 0.09       | 0.07       | 0.00        | 0.56         | 54.74       | 0.15      | 1.54% | 1.00% |
|           | w_shallow  | 0.01       | 0.00       | 0.02        | 1.04         | 0.01        | 17.39     | 5.87% | 5.73% |
|           |            |            |            |             |              |             |           |       |       |
| FN        | 2.63%      | 13.89%     | 0.96%      | 8.92%       | 0.32%        | 5.83%       |           |       |       |
| mFN       | 0.13%      | 5.82%      | 0.71%      | 8.86%       | 0.18%        | 4.97%       |           |       |       |
| n         | 1022       | 202        | 828        | 4198 (2000) | 12667 (2000) | 4291 (2000) |           |       |       |
